# Supplementary material for: Multimodal and multifunctional nanoparticles with platelet targeting ability and phase transition efficiency for the molecular imaging and thrombolysis of coronary microthrombi
Source: Royal Society of Chemistry journal article supplement (doi:10.1039/d0bm00818d), 2020-01-01
Supplement: d0bm00818d1.pdf [file d0bm00818d1.pdf]

### Supplementary materials

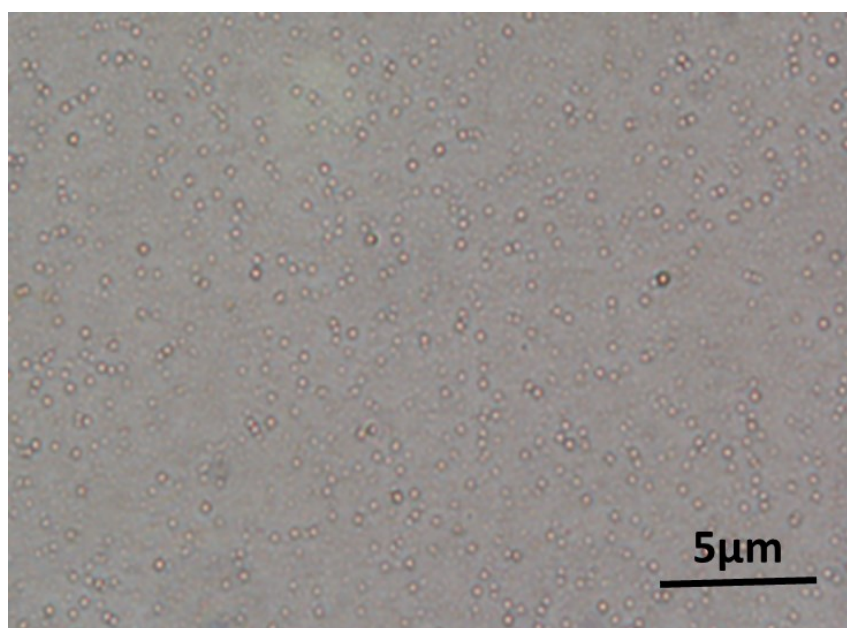

Fig. S1 Optical microscope image of PLGA-cRGD-PFH-ICG NPs.

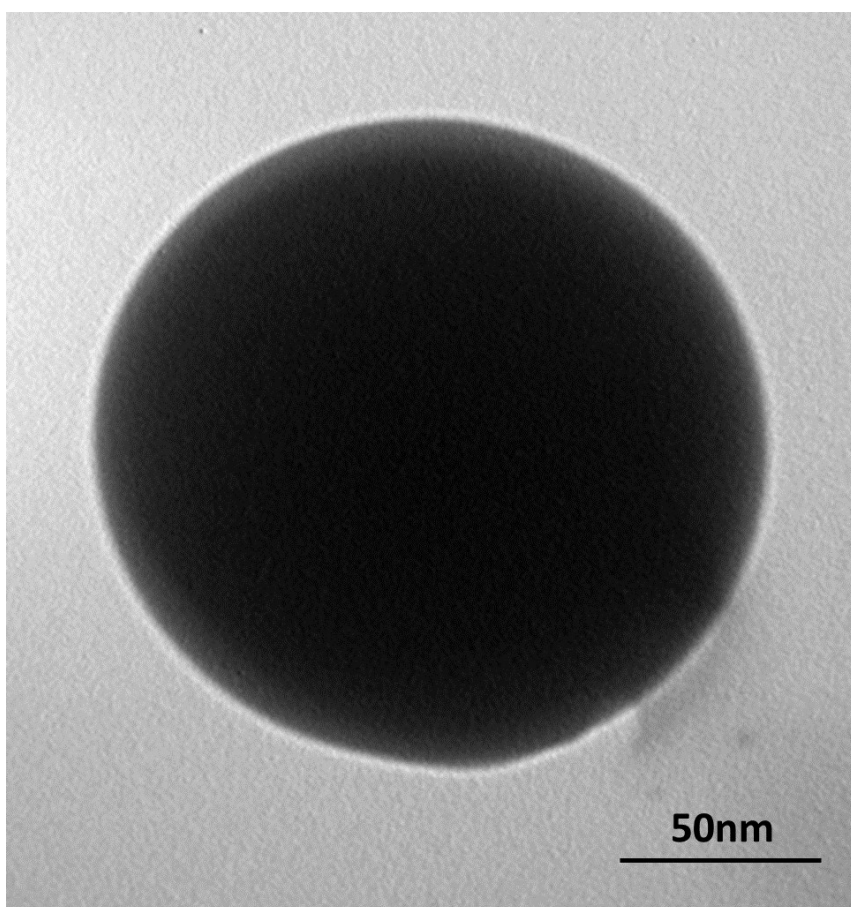

Fig. S2 Transmission electron microscopy(TEM) image of the PLGA-cRGD-PFH-ICG NPs.
